# Supplementary material for: COVID-19 patient experiences in prehospital pathways: a processual approach using life-events calendar method and state sequence analysis shows detrimental delays
Source: HighWire-hosted journal article supplement (doi:10.1136/fmch-2023-002447), 2024-01-01
Supplement: fmch-2023-002447supp001_data_supplement.pdf [file fmch-2023-002447supp001_data_supplement.pdf]

**Supplementary Material 1**

# Life-event calendar C-19

| Day<br>D0 =<br>First<br>symptom | Clinical History |          |         |       |                                 |          |                    |                               | Health care pathway    |                          |                                                                      |                                              |                       |                                                                                                                                                                 |                    |                                                      |                         |
|---------------------------------|------------------|----------|---------|-------|---------------------------------|----------|--------------------|-------------------------------|------------------------|--------------------------|----------------------------------------------------------------------|----------------------------------------------|-----------------------|-----------------------------------------------------------------------------------------------------------------------------------------------------------------|--------------------|------------------------------------------------------|-------------------------|
|                                 | Cough            | Asthenia | Anosmia | Fever | Dyspnea/<br>Chest<br>discomfort | Headache | Saturation<br>test | Desaturation<br>(saturometer) | Willingness<br>to test | Performing<br>a PCR test | Had the<br>result of a<br>PCR/Ag<br>test<br>(specify<br>the result)) | Self-<br>diagnosti<br>c<br>questionn<br>aire | Clinical<br>diagnosis | GP<br>consultatio<br>n (specify<br>if Family<br>practitione<br>r or<br>Emergenc<br>y Services<br>doctor<br>with or<br>without a<br>physical<br>examinatio<br>n) | ED<br>consultation | Phone<br>call to<br>Emergen<br>cy Health<br>Services | Hospi<br>talizat<br>ion |
| D0                              |                  |          |         |       |                                 |          |                    |                               |                        |                          |                                                                      |                                              |                       |                                                                                                                                                                 |                    |                                                      |                         |
| D1                              |                  |          |         |       |                                 |          |                    |                               |                        |                          |                                                                      |                                              |                       |                                                                                                                                                                 |                    |                                                      |                         |
| D2                              |                  |          |         |       |                                 |          |                    |                               |                        |                          |                                                                      |                                              |                       |                                                                                                                                                                 |                    |                                                      |                         |
| D3                              |                  |          |         |       |                                 |          |                    |                               |                        |                          |                                                                      |                                              |                       |                                                                                                                                                                 |                    |                                                      |                         |
| D4                              |                  |          |         |       |                                 |          |                    |                               |                        |                          |                                                                      |                                              |                       |                                                                                                                                                                 |                    |                                                      |                         |
| D5                              |                  |          |         |       |                                 |          |                    |                               |                        |                          |                                                                      |                                              |                       |                                                                                                                                                                 |                    |                                                      |                         |
| D6                              |                  |          |         |       |                                 |          |                    |                               |                        |                          |                                                                      |                                              |                       |                                                                                                                                                                 |                    |                                                      |                         |
| D7                              |                  |          |         |       |                                 |          |                    |                               |                        |                          |                                                                      |                                              |                       |                                                                                                                                                                 |                    |                                                      |                         |
| D8                              |                  |          |         |       |                                 |          |                    |                               |                        |                          |                                                                      |                                              |                       |                                                                                                                                                                 |                    |                                                      |                         |
| D9                              |                  |          |         |       |                                 |          |                    |                               |                        |                          |                                                                      |                                              |                       |                                                                                                                                                                 |                    |                                                      |                         |

## PROFIL SOCIO-DEMOGRAPHIQUE DU PATIENT

**\* 2 Q1 Quel âge avez-vous ?**

- 📌 Votre réponse doit être comprise entre 18 et 100
- 📌 Seul un nombre entier peut être inscrit dans ce champ.

 ans**\* 3 Q2 Etes-vous :**

- 📌 Veuillez sélectionner une réponse ci-dessous

- Un homme
- Une femme

**\* 4 Q3 Vivez-vous seul(e) ?**

- Oui
- Non

**\* 5 Q4 Quel est votre niveau d'étude ?**

- 📌 Veuillez sélectionner une réponse ci-dessous

- Pas de diplôme
- CAP-BEP
- BAC
- BAC+2 ou plus

**\* 6 Q5 Indiquez votre catégorie socio-professionnelle :**

- 📌 Veuillez sélectionner une réponse ci-dessous

- Agriculteurs exploitants
- Artisans, commerçants et chefs d'entreprise
- Cadres et professions intellectuelles supérieures
- Professions Intermédiaires
- Employés
- Ouvriers
- Retraités
- Sans activité professionnelle

**\* 7 Q5a Vous êtes actuellement sans activité professionnelle.**

- 📌 Veuillez sélectionner une réponse ci-dessous

- Vous avez déjà eu une activité professionnelle auparavant
- Vous n'avez jamais eu d'activité professionnelle

\* 8 Q5b **Avant votre retraite, quelle était votre catégorie socio-professionnelle ?**

📌 Veuillez sélectionner une réponse ci-dessous

- Agriculteurs exploitants
- Artisans, commerçants et chefs d'entreprise
- Cadres et professions intellectuelles supérieures
- Professions Intermédiaires
- Employés
- Ouvriers

\* 9 Q6 **Vous êtes en activité ou retraité(e).**

|                                                                | Oui                   | Non                   |
|----------------------------------------------------------------|-----------------------|-----------------------|
| Etes-vous ou avez-vous été médecin ?                           | <input type="radio"/> | <input type="radio"/> |
| Exercez-vous ou avez-vous exercé une profession paramédicale ? | <input type="radio"/> | <input type="radio"/> |

\* 10 Q8 **Avez-vous, dans votre entourage (familial ou amical), une personne travaillant dans le milieu médical ou paramédical susceptible de vous conseiller ?**

- Oui
- Non

📌 Exemple : médecin, infirmier...

## PROFIL SANTE

\* 11 Q9 **Actuellement, avez-vous une maladie pour laquelle vous avez un traitement et/ou un suivi médical ?**

- Oui
- Non

**\* 12 Q10 Indiquez les maladies que vous avez actuellement :**

Cochez la ou les réponses

- |                                                                                           |                                                                    |
|-------------------------------------------------------------------------------------------|--------------------------------------------------------------------|
| <input type="checkbox"/> Cancer en cours de traitement (quel que soit le type)            | <input type="checkbox"/> Maladie de Parkinson                      |
| <input type="checkbox"/> Diabète                                                          | <input type="checkbox"/> Epilepsie                                 |
| <input type="checkbox"/> Insuffisance rénale sous dialyse                                 | <input type="checkbox"/> Lupus érythémateux disséminé              |
| <input type="checkbox"/> Hypertension artérielle                                          | <input type="checkbox"/> Polyarthrite rhumatoïde                   |
| <input type="checkbox"/> Insuffisance cardiaque                                           | <input type="checkbox"/> Sarcoidose                                |
| <input type="checkbox"/> Troubles du rythme cardiaque                                     | <input type="checkbox"/> Maladie de Horton                         |
| <input type="checkbox"/> Asthme                                                           | <input type="checkbox"/> Syndrome de Raynaud                       |
| <input type="checkbox"/> Maladie chronique pulmonaire (BPCO et insuffisance respiratoire) | <input type="checkbox"/> Syndrome de Gougerot-Sjögren              |
| <input type="checkbox"/> Cirrhose du foie                                                 | <input type="checkbox"/> Mutation du facteur de Leiden             |
| <input type="checkbox"/> Hépatite chronique                                               | <input type="checkbox"/> Maladie de Marfan                         |
| <input type="checkbox"/> Dépression                                                       | <input type="checkbox"/> Maladie d'Addison                         |
| <input type="checkbox"/> Ulcère gastrique                                                 | <input type="checkbox"/> Maladie articulaire : rhumatisme          |
| <input type="checkbox"/> Hypothyroïdie                                                    | <input type="checkbox"/> Apnée du sommeil nécessitant de l'oxygène |
| <input type="checkbox"/> Hyperthyroïdie                                                   | <input type="checkbox"/> Autre : <input type="text"/>              |

**\* 13 Q11 Avez-vous eu une ou plusieurs maladies dans le passé ?** Oui  Non**\* 14 Q12 Indiquez la ou les maladies que vous avez eues dans le passé :**

Cochez la ou les réponses

- |                                                                     |                                                         |
|---------------------------------------------------------------------|---------------------------------------------------------|
| <input type="checkbox"/> Embolie pulmonaire                         | <input type="checkbox"/> Cancer datant de plus de 5 ans |
| <input type="checkbox"/> Infarctus du myocarde                      | <input type="checkbox"/> Anévrisme de l'aorte           |
| <input type="checkbox"/> Accident Vasculaire Cérébral (AVC)         | <input type="checkbox"/> Anévrisme de la carotide       |
| <input type="checkbox"/> Accident Ischémique Transitoire (AIT)      | <input type="checkbox"/> Greffe d'organe                |
| <input type="checkbox"/> Artérite oblitérante des membres inférieur | <input type="checkbox"/> Thrombose veineuse profonde    |
| <input type="checkbox"/> Troubles du rythme cardiaque               | <input type="checkbox"/> Phlébite                       |
| <input type="checkbox"/> Cancer datant de moins de 5 ans            | <input type="checkbox"/> Autre : <input type="text"/>   |

\* 15 Q12bis Vous avez eu un AVC dans le passé.

A ce jour, avez-vous des séquelles ?

Oui  Non

\* 16 Q13 Veuillez répondre aux questions suivantes sur votre profil :

|                                                                | Oui                   | Non                   |
|----------------------------------------------------------------|-----------------------|-----------------------|
| Etes-vous immunodéprimé(e)*                                    | <input type="radio"/> | <input type="radio"/> |
| Prenez-vous des médicaments tous les jours ?                   | <input type="radio"/> | <input type="radio"/> |
| Actuellement fumez-vous ?                                      | <input type="radio"/> | <input type="radio"/> |
| Buvez-vous plus de 2 verres d'alcool par jour tous les jours ? | <input type="radio"/> | <input type="radio"/> |

\*Une personne est immunodéprimée quand son système immunitaire ne fonctionne pas bien et qu'elle est donc plus vulnérable aux infections.

\* 17 Q13a Combien de médicaments prenez-vous par jour ?

ⓘ Votre réponse doit être comprise entre 1 et 20

ⓘ Seul un nombre entier peut être inscrit dans ce champ.

médicaments par jour

\* 18 Q13b Combien de cigarettes fumez-vous par jour ?

ⓘ Votre réponse doit être comprise entre 1 et 99

ⓘ Seul un nombre entier peut être inscrit dans ce champ.

cigarettes par jour

\* 19 Q14 Indiquez :

ⓘ Seuls les nombres sont acceptés.

Votre taille (en cm)

Votre poids (en kg)

ⓘ Exemple : pour 1m60, indiquez 160cm.

\* 20 Q15 Avez-vous un médecin traitant ?

Oui  Non

\* 21 Q16 Quelle relation de confiance avez-vous avec votre médecin traitant ?

ⓘ Veuillez sélectionner une réponse ci-dessous

- Excellente
- Normale
- Mauvaise
- Très mauvaise

22 Q17 **Avez-vous des difficultés à avoir un rendez-vous avec votre médecin traitant ?**

📌 Veuillez sélectionner une réponse ci-dessous

- Jamais
- Parfois
- Souvent
- Tout le temps

\* 23 Q18 **Au cours d'une année, combien de fois allez-vous consulter (hors contexte covid 19) ?**

|                                                      | Une fois              | Plusieurs fois        | Jamais                |
|------------------------------------------------------|-----------------------|-----------------------|-----------------------|
| Votre médecin traitant / Un médecin généraliste      | <input type="radio"/> | <input type="radio"/> | <input type="radio"/> |
| Un médecin spécialiste (gynécologue, cardiologue...) | <input type="radio"/> | <input type="radio"/> | <input type="radio"/> |
| Un ostéopathe                                        | <input type="radio"/> | <input type="radio"/> | <input type="radio"/> |
| Un homéopathe                                        | <input type="radio"/> | <input type="radio"/> | <input type="radio"/> |
| Un naturopathe                                       | <input type="radio"/> | <input type="radio"/> | <input type="radio"/> |

\* 24 Q19 **Durant les 5 dernières années, avez-vous eu des séjours hospitaliers (hors Covid-19) ?**

📌 Veuillez sélectionner une réponse ci-dessous

- Oui, une fois
- Oui, plusieurs fois
- Non, aucun

📌 Un séjour = au moins une nuit à l'hôpital

## CIRCONSTANCES DE DECOUVERTE DE LA CONTAMINATION PAR LE COVID-19

\* 25 Q20 **Vous avez découvert que vous aviez le COVID-19 :**

📌 Veuillez sélectionner une réponse ci-dessous

- A l'occasion d'un dépistage pour des raisons personnelles/administratives (voyage, travail, fête de famille...)
- A l'occasion d'un dépistage car vous étiez cas contact
- À la suite de l'apparition de symptômes

\* 26 Q21 **Combien de jours, approximativement, se sont écoulés entre le résultat de votre test et les premiers symptômes ?**

📌 Seul un nombre entier peut être inscrit dans ce champ.

j

\* 27 Q22 **Avant de savoir que vous aviez le COVID-19, avez-vous réalisé, la semaine précédente, des tests de dépistage COVID qui se sont avérés négatifs ?**

- Oui  Non

\* 28 Q22a **Combien de tests, dont le résultat était négatif, avez-vous réalisés ?**

! Seul un nombre entier peut être inscrit dans ce champ.

tests

\* 29 Q22b **Parmi ces tests dont les résultats étaient négatifs, lesquels avez-vous réalisés ?**

! Cochez la ou les réponses

Test antigénique (en pharmacie)

Test PCR

Auto-test

**N.B. : Questions 29, 30 et 31 identiques car conditionnelles selon le nombre de tests réalisés à Q22a**

### DELAI 1er SYMPTOME - HOSPITALISATION

\* 32 Q0 **Combien de jours se sont écoulés entre l'apparition de votre 1er symptôme (J0) et votre hospitalisation pour COVID-19 ?**

! Votre réponse doit être comprise entre 1 et 16

! Seul un nombre entier peut être inscrit dans ce champ.

j

! *Minimum* : 1 jour

*Maximum* : 16 jours

33 Q0conf **Vous avez été hospitalisé(e) jours après l'apparition du 1er symptôme (J0)**

! Si cette durée est erronée, modifier la réponse à la question précédente.

\* 34 Q0a **Entre l'apparition du 1er symptôme (J0) et votre hospitalisation (J), étiez-vous en période d'isolement ailleurs qu'à votre domicile (hôtel, centre de vacances...)?**

Oui  Non

**N.B. : Questions 35 à 38 de type équationnelles avec code JavaScript, invisibles à l'écran**

## SYMPTÔME INITIAL (J0)

\* 39 QTEST02 Selon vous, quel symptôme est apparu en **premier** (J0) ?

ⓘ Veuillez sélectionner une réponse ci-dessous

Veillez choisir ...

Veillez choisir ...

- Perte de gout ou d'odorat
- Toux / mal de gorge
- Fièvre modérée (38 à 40°)
- Fièvre intense (supérieure à 40°)
- Céphalées modérées (maux de tête)
- Céphalées intenses
- Nausées modérées
- Nausées intenses empêchant l'alimentation
- Diarrhée
- Difficultés à respirer
- Difficultés à respirer intense (sensation d'étouffer)
- Courbatures
- Fatigue modérée
- Fatigue intense (difficulté à se déplacer, s'alimenter)
- Perte de connaissance
- Confusion

## SYMPTÔMES

\* 40 QTEST11 Sélectionnez **tous les symptômes** que vous avez eus, depuis l'apparition du **1er symptôme (J0)** jusqu'à votre hospitalisation (J) :

Rappel de votre 1er symptôme à J0 :

ⓘ Cochez la ou les réponses

- |                                                                    |                                                                                              |
|--------------------------------------------------------------------|----------------------------------------------------------------------------------------------|
| <input type="checkbox"/> Perte de gout ou d'odorat                 | <input type="checkbox"/> Difficultés à respirer                                              |
| <input type="checkbox"/> Toux / mal de gorge                       | <input type="checkbox"/> Difficultés à respirer intense (sensation d'étouffer)               |
| <input type="checkbox"/> Fièvre modérée (38 à 40°)                 | <input type="checkbox"/> Courbatures                                                         |
| <input type="checkbox"/> Fièvre intense (supérieure à 40°)         | <input type="checkbox"/> Fatigue modérée                                                     |
| <input type="checkbox"/> Céphalées modérées (maux de tête)         | <input type="checkbox"/> Fatigue intense (difficulté à se déplacer, s'alimenter)             |
| <input type="checkbox"/> Céphalées intenses                        | <input type="checkbox"/> Perte de connaissance                                               |
| <input type="checkbox"/> Nausées modérées                          | <input type="checkbox"/> Confusion                                                           |
| <input type="checkbox"/> Nausées intenses empêchant l'alimentation | <input type="checkbox"/> Désaturation (inférieure à 90) par oxymètre de pouls*/prise de sang |
| <input type="checkbox"/> Diarrhée                                  |                                                                                              |

ⓘ \*Oxymètre de pouls :

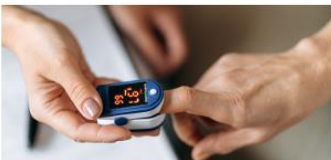



\* 41 QTEST14 Indiquez le **jour d'apparition** de chacun de ces symptômes et la **durée\* de chacun d'entre eux, depuis l'apparition du 1er symptôme (J0), jusqu'à votre hospitalisation (J)** pour COVID-19 :

RAPPEL de votre 1er symptôme à J0 :

\* Pour indiquer la durée, cochez le nombre de cases qui correspondent à la durée du symptôme (exemple ci-dessous)

|                                                                     | J0                       |
|---------------------------------------------------------------------|--------------------------|
| Perte de gout ou d'odorat                                           | <input type="checkbox"/> |
| Toux / mal de gorge                                                 | <input type="checkbox"/> |
| Fièvre modérée (38 à 40°)                                           | <input type="checkbox"/> |
| Fièvre intense (supérieure à 40°)                                   | <input type="checkbox"/> |
| Céphalées modérées (maux de tête)                                   | <input type="checkbox"/> |
| Céphalées intenses                                                  | <input type="checkbox"/> |
| Nausées modérées                                                    | <input type="checkbox"/> |
| Nausées intenses empêchant l'alimentation                           | <input type="checkbox"/> |
| Diarrhée                                                            | <input type="checkbox"/> |
| Difficultés à respirer                                              | <input type="checkbox"/> |
| Difficultés à respirer intense (sensation d'étouffer)               | <input type="checkbox"/> |
| Courbatures                                                         | <input type="checkbox"/> |
| Fatigue modérée                                                     | <input type="checkbox"/> |
| Fatigue intense (difficulté à se déplacer, s'alimenter)             | <input type="checkbox"/> |
| Perte de connaissance                                               | <input type="checkbox"/> |
| Confusion                                                           | <input type="checkbox"/> |
| Désaturation (inférieure à 90) par oxymètre de pouls*/prise de sang | <input type="checkbox"/> |

**Exemple :**

J'ai été hospitalisé à J6, soit 6 jours après l'apparition de mon 1er symptôme (J0).

J'ai eu de la toux à J0, **pendant 4 jours**, puis des difficultés à respirer de J4 à J6 (**durée totale de 3 jours**).

Enfin, j'ai eu **4 jours** de courbatures, à J0 et J1, puis de nouveau de J5 à J6.

|                                                       | J0                                  | J1                                  | J2                                  | J3                                  | J4                                  | J5                                  | J6                                  |
|-------------------------------------------------------|-------------------------------------|-------------------------------------|-------------------------------------|-------------------------------------|-------------------------------------|-------------------------------------|-------------------------------------|
| Toux / mal de gorge                                   | <input checked="" type="checkbox"/> | <input checked="" type="checkbox"/> | <input checked="" type="checkbox"/> | <input checked="" type="checkbox"/> | <input type="checkbox"/>            | <input type="checkbox"/>            | <input type="checkbox"/>            |
| Difficultés à respirer intense (sensation d'étouffer) | <input type="checkbox"/>            | <input type="checkbox"/>            | <input type="checkbox"/>            | <input type="checkbox"/>            | <input checked="" type="checkbox"/> | <input checked="" type="checkbox"/> | <input checked="" type="checkbox"/> |
| Courbatures                                           | <input checked="" type="checkbox"/> | <input checked="" type="checkbox"/> | <input type="checkbox"/>            | <input type="checkbox"/>            | <input type="checkbox"/>            | <input checked="" type="checkbox"/> | <input checked="" type="checkbox"/> |

## RECOURS ACTES ET SERVICES

\* 42 QTEST21 Parmi ces propositions, sélectionnez tous les actes / services auxquels vous avez eu recours, depuis l'apparition du symptôme initial (J0) jusqu'à votre hospitalisation (J) :

🔑 Cochez la ou les réponses

- |                                                                      |                                                               |
|----------------------------------------------------------------------|---------------------------------------------------------------|
| <input type="checkbox"/> Réalisation(s) test(s) antigénique(s)       | <input type="checkbox"/> Consultation dans un centre de santé |
| <input type="checkbox"/> Réalisation(s) test(s) PCR                  | <input type="checkbox"/> Consultation IHU                     |
| <input type="checkbox"/> Résultat(s) test(s) antigénique(s)          | <input type="checkbox"/> Consultation CHU Nice                |
| <input type="checkbox"/> Résultat(s) test(s) PCR                     | <input type="checkbox"/> Consultation SOS Médecins            |
| <input type="checkbox"/> Consultation médecin généraliste en cabinet | <input type="checkbox"/> Consultation au service d'urgence    |
| <input type="checkbox"/> Appel médecin généraliste pour conseil      | <input type="checkbox"/> Appel SAMU (15)                      |
| <input type="checkbox"/> Téléconsultation médecin généraliste        | <input type="checkbox"/> Appel Pompiers (18)                  |

\* 43 Q1J14 Veuillez indiquer les différents actes et services que vous avez utilisés, depuis l'apparition du 1er symptôme (J0) jusqu'à votre hospitalisation (J) :

|                                          | J0                       |
|------------------------------------------|--------------------------|
| Réalisation(s) test(s) antigénique(s)    | <input type="checkbox"/> |
| Réalisation(s) test(s) PCR               | <input type="checkbox"/> |
| Résultat(s) test(s) antigénique(s)       | <input type="checkbox"/> |
| Résultat(s) test(s) PCR                  | <input type="checkbox"/> |
| Consultation médecin généraliste cabinet | <input type="checkbox"/> |
| Appel médecin généraliste pour conseil   | <input type="checkbox"/> |
| Téléconsultation médecin généraliste     | <input type="checkbox"/> |
| Consultation dans un centre de santé     | <input type="checkbox"/> |
| Consultation IHU                         | <input type="checkbox"/> |
| Consultation CHU Nice                    | <input type="checkbox"/> |
| Consultation SOS Médecins                | <input type="checkbox"/> |
| Consultation au service d'urgence        | <input type="checkbox"/> |
| Appel SAMU (15)                          | <input type="checkbox"/> |
| Appel Pompiers (18)                      | <input type="checkbox"/> |

🔑 Exemple :

J'ai fait un test PCR à J0, et j'ai eu les résultats le lendemain, à J1.

J'ai pris un RDV avec mon médecin généraliste à J3, puis un autre RDV à J7.

Enfin, j'ai appelé le SAMU à J9, le jour de mon hospitalisation.

|                                            | J0                       | J1                       | J2                       | J3                       | J4                       | J5                       | J6                       | J7                       | J8                       | J9                       |
|--------------------------------------------|--------------------------|--------------------------|--------------------------|--------------------------|--------------------------|--------------------------|--------------------------|--------------------------|--------------------------|--------------------------|
| Recours aux tests PCR                      | ☑                        | <input type="checkbox"/> |
| Résultats du test PCR                      | <input type="checkbox"/> | ☑                        | <input type="checkbox"/> |
| Prise RDV consultation médecin généraliste | <input type="checkbox"/> | <input type="checkbox"/> | ☑                        | <input type="checkbox"/> | <input type="checkbox"/> | <input type="checkbox"/> | <input type="checkbox"/> | ☑                        | <input type="checkbox"/> | <input type="checkbox"/> |
| Appel SAMU (15)                            | <input type="checkbox"/> | ☑                        |

## TRAITEMENT / EXAMENS / BILANS

44 QTEST32 **Sélectionnez tous les traitements / examens / bilans que vous avez eus, depuis l'apparition du 1er symptôme (J0) jusqu'à votre hospitalisation (J) :**

**📌** Cochez la ou les réponses

- |                                                                        |                                                                     |
|------------------------------------------------------------------------|---------------------------------------------------------------------|
| <input type="checkbox"/> Antibiotiques                                 | <input type="checkbox"/> Oxygène à domicile ou en service d'urgence |
| <input type="checkbox"/> Anticoagulants                                | <input type="checkbox"/> Vitamine D                                 |
| <input type="checkbox"/> Bilan biologique réalisé                      | <input type="checkbox"/> Zinc                                       |
| <input type="checkbox"/> Corticoïdes                                   | <input type="checkbox"/> Protocole IHU / Protocole "Raoult"         |
| <input type="checkbox"/> Paracétamol (Doliprane, Dafalgan, Efferalgan) | <input type="checkbox"/> Aucun                                      |
| <input type="checkbox"/> Examen radiologique/Scanner réalisé           |                                                                     |

\*45 QTEST33 **Indiquez, parmi les traitements / examens / bilans sélectionnés, le début et la durée de chacun d'entre eux, depuis l'apparition du symptôme initial (J0) jusqu'à votre hospitalisation (J) :**

|                                               | J0                       |
|-----------------------------------------------|--------------------------|
| Antibiotiques                                 | <input type="checkbox"/> |
| Anticoagulants                                | <input type="checkbox"/> |
| Bilan biologique réalisé                      | <input type="checkbox"/> |
| Corticoïdes                                   | <input type="checkbox"/> |
| Paracétamol (Doliprane, Dafalgan, Efferalgan) | <input type="checkbox"/> |
| Examen radiologique/Scanner réalisé           | <input type="checkbox"/> |
| Oxygène à domicile ou en service d'urgence    | <input type="checkbox"/> |
| Vitamine D                                    | <input type="checkbox"/> |
| Zinc                                          | <input type="checkbox"/> |
| Protocole IHU / Protocole "Raoult"            | <input type="checkbox"/> |

**📌 Exemple :**

J'ai pris du Paracétamol dès l'apparition des symptômes à J0, jusqu'à J2, puis de J5 à J6 (durée totale de traitement de 5j).

J'ai ensuite pris de la Vitamine D à J1, J3 et J5 (donc pendant 3 jours).

Enfin, j'ai réalisé un bilan biologique à J4.

|                                       | J0                                  | J1                                  | J2                                  | J3                                  | J4                                  | J5                                  | J6                                  |
|---------------------------------------|-------------------------------------|-------------------------------------|-------------------------------------|-------------------------------------|-------------------------------------|-------------------------------------|-------------------------------------|
| Bilan biologique réalisé              | <input type="checkbox"/>            | <input type="checkbox"/>            | <input type="checkbox"/>            | <input type="checkbox"/>            | <input checked="" type="checkbox"/> | <input type="checkbox"/>            | <input type="checkbox"/>            |
| Paracétamol (Doliprane, Dafalgan,...) | <input checked="" type="checkbox"/> | <input checked="" type="checkbox"/> | <input checked="" type="checkbox"/> | <input type="checkbox"/>            | <input type="checkbox"/>            | <input checked="" type="checkbox"/> | <input checked="" type="checkbox"/> |
| Vitamine D                            | <input type="checkbox"/>            | <input checked="" type="checkbox"/> | <input type="checkbox"/>            | <input checked="" type="checkbox"/> | <input type="checkbox"/>            | <input checked="" type="checkbox"/> | <input type="checkbox"/>            |

\* 46 QTEST34 Parmi les traitements suivants, indiquez s'ils ont été pris :

|                                               | Sur prescription médicale | En automédication     |
|-----------------------------------------------|---------------------------|-----------------------|
| Antibiotiques                                 | <input type="radio"/>     | <input type="radio"/> |
| Anticoagulants                                | <input type="radio"/>     | <input type="radio"/> |
| Corticoides                                   | <input type="radio"/>     | <input type="radio"/> |
| Paracétamol (Doliprane, Dafalgan, Efferalgan) | <input type="radio"/>     | <input type="radio"/> |
| Vitamine D                                    | <input type="radio"/>     | <input type="radio"/> |
| Zinc                                          | <input type="radio"/>     | <input type="radio"/> |

📌 **Automédication** : utilisation, hors prescription médicale, de médicaments.

## PRISE EN CHARGE

\* 47 Q23 Durant la période où vous aviez le Covid et que vous étiez à votre domicile, étiez-vous accompagné(e) (prise de nouvelles, visites régulières, appels...)?

Oui  Non

\* 48 Q24 Qu'est-ce qui a déclenché votre hospitalisation ?

📌 Veuillez sélectionner une réponse ci-dessous

📌 Au besoin, veuillez préciser le champ 'Autre' :

- Médecin généraliste
- Votre médecin traitant
- Appel SOS médecin/Pompier
- Après une consultation d'urgence
- Ma famille
- Moi-même
- Mes ami(e)s
- Autre :

\* 49 Q24b Selon vous, avant de contracter le Covid, comment jugeriez-vous votre comportement pour éviter la contamination ?

📌 Veuillez sélectionner une réponse ci-dessous

- Extrêmement prudent
- Très prudent
- Moyennement prudent
- Ni prudent ni imprudent
- Moyennement imprudent
- Très imprudent
- Extrêmement imprudent

\* 50 Q25 **Selon vous, avant de vous faire hospitaliser :**

|                                                                | Oui                   | Non                   |
|----------------------------------------------------------------|-----------------------|-----------------------|
| Avez-vous eu conscience de la gravité de votre état de santé ? | <input type="radio"/> | <input type="radio"/> |
| Avez-vous rencontré des difficultés pour voir un médecin ?     | <input type="radio"/> | <input type="radio"/> |
| Avez-vous rencontré des difficultés pour vous faire soigner ?  | <input type="radio"/> | <input type="radio"/> |

\* 51 Q26 **Avec le recul, quel est votre niveau de satisfaction concernant votre prise en charge médicale avant d'être hospitalisé(e) ?**

📌 Veuillez sélectionner une réponse ci-dessous

- Très satisfait
- Plutôt satisfait
- Ni satisfait, ni insatisfait
- Plutôt insatisfait
- Très insatisfait
- Non concerné

\* 52 Q0a3 **Vous avez été hospitalisé(e) pour Covid-19 :**

📌 Cochez la ou les réponses

- A l'IHU de Marseille
- Au CHU de Nice

\* 53 Q0a4 **Quand avez-vous été hospitalisé(e) ?**

Format : mm/yyyy

📌 Indiquez le mois et l'année

\* 54 Q0b **Combien de jours avez-vous été hospitalisé(e) pour cet épisode de Covid-19 ?**

📌 Seul un nombre entier peut être inscrit dans ce champ.

 j

\* 55 Q0c **Au cours de votre séjour à l'hôpital, vous étiez en :**

📌 Veuillez sélectionner une réponse ci-dessous

- Réanimation
- Soins intensifs
- Aucun de ces choix

\* 56 Q27 **Après votre hospitalisation, avez-vous fait un séjour en Soins de Suite et de Réadaptation (SSR) ?**

- Oui
- Non

\* 57 Q28 Lorsque vous êtes rentré(e) à votre domicile, avez-vous eu besoin :

|                      | Oui                   | Non                   |
|----------------------|-----------------------|-----------------------|
| D'oxygène à domicile | <input type="radio"/> | <input type="radio"/> |
| De rééducation       | <input type="radio"/> | <input type="radio"/> |

\* 58 Q29 Par rapport aux hommes/femmes de votre âge, vous pensiez que votre risque d'attraper le Covid était :

ⓘ Veuillez sélectionner une réponse ci-dessous

Veillez choisir ...

Veillez choisir ...

- Beaucoup moins important que pour les autres hommes/femmes de mon âge
- Moins important que pour les autres hommes/femmes de mon âge
- Ni plus ni moins important que pour les autres hommes/femmes de mon âge
- Plus important que pour les autres hommes/femmes de mon âge
- Beaucoup plus important que pour les autres hommes/femmes de mon âge

\* 59 Q30 Actuellement, avez-vous toujours des séquelles du Covid ?

Oui  Non

\* 60 Q30bis Quelles séquelles avez-vous ?

ⓘ Cochez la ou les réponses

- Physiques (difficulté à respirer, fatigue)
- Neurologiques (perte de mémoire, troubles de la concentration)
- Psychologiques (dépression, anxiété)
- Troubles du sommeil, insomnies
- Autre :

\* 61 Q31 Depuis la fin de votre hospitalisation :

|                                                      | Oui                   | Non                   |
|------------------------------------------------------|-----------------------|-----------------------|
| Avez-vous repris votre vie comme avant ?             | <input type="radio"/> | <input type="radio"/> |
| Avez-vous à nouveau été infecté(e) par le Covid-19 ? | <input type="radio"/> | <input type="radio"/> |

62 Q32 Avez-vous des remarques / informations complémentaires à faire sur votre parcours pré-hospitalier ?
