# Supplementary material for: COVID-19 patient experiences in prehospital pathways: a processual approach using life-events calendar method and state sequence analysis shows detrimental delays
Source: PubMed Central journal article supplement — Fam Med Community Health. 2024 Jan 12;12(1):e002447. doi: 10.1136/fmch-2023-002447 (PMC10806557; doi:10.1136/fmch-2023-002447), 2024-01-12

### Supplementary material 2. Clusters of symptom sequences - Hierarchical cluster analysis (n=312)

#### Inertia plot

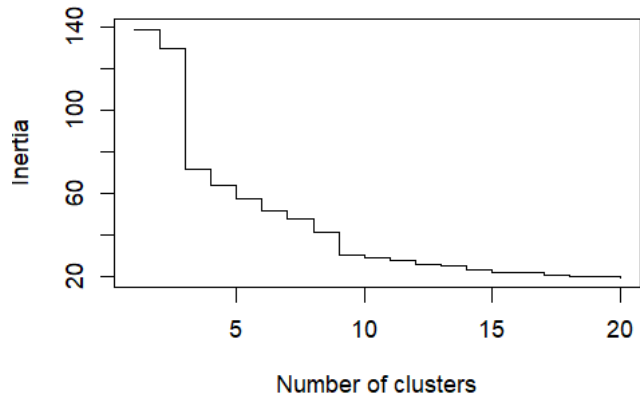

#### Dendrogram

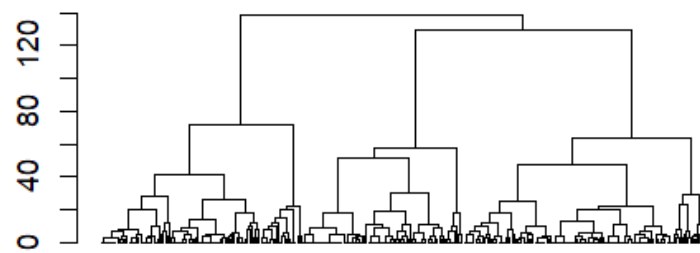

Supplement: fmch-2023-002447supp002.pdf [file fmch-2023-002447supp002.pdf]
